# Supplementary material for: Damage to the prefrontal cortex increases utilitarian moral judgements
Source: Springer Nature journal article supplement (doi:10.1038/nature05631), 2007-03-21
Supplement: nature05631-s1.pdf [file nature05631-s1.pdf]

Browse Articles
| Nature


Skip to main content

Thank you for visiting nature.com. You are using a browser version with limited support for CSS. To obtain
the best experience, we recommend you use a more up to date browser (or turn off compatibility mode in
Internet Explorer). In the meantime, to ensure continued support, we are displaying the site without styles
and JavaScript.

Advertisement


- View all journals
- Search
- Log in

- Explore content
- About the journal
- Publish with us
- Subscribe

- Sign up for alerts
- RSS feed


1. nature
2. browse articles

# Browse Articles

## Filter By:

Article Type

All

- All
- Article (23155)
- Book Review (21164)
- Books & Arts (2987)
- Books Received (28076)
- Correspondence (11972)
- Editorial (4205)
- Erratum (1641)
- Letter (120287)
- Matters Arising (1725)
- Miscellany (7852)
- News (104854)
- News & Views (40698)
- News Feature (2412)
- News in Brief (1760)
- Obituary (7010)
- Opinion (5080)
- Research Highlight (2428)
- Research Highlights (4493)
- Scientific Correspondence (4028)
- Supplement to Nature (1556)

Year

All

- All
- 2024 (1579)
- 2023 (4320)
- 2022 (4104)
- 2021 (3737)
- 2020 (3623)
- 2019 (3979)
- 2018 (3934)
- 2017 (3696)
- 2016 (3903)
- 2015 (4056)
- 2014 (4078)
- 2013 (4119)
- 2012 (4260)
- 2011 (4115)
- 2010 (4173)
- 2009 (4396)
- 2008 (4681)
- 2007 (4089)
- 2006 (4072)
- 2005 (4066)

- ### Publisher Correction: Network-level encoding of local neurotransmitters in cortical astrocytes

  - Michelle K. Cahill
  - Max Collard
  - Kira E. Poskanzer

  Publisher CorrectionOpen Access13 May 2024
- ### Plasmid targeting and destruction by the DdmDE bacterial defence system

  - Jack P. K. Bravo
  - Delisa A. Ramos
  - David W. Taylor

  Article13 May 2024
- ### Publisher Correction: Ultra-compact quasi-true time delay for boosting wireless channel capacity

  - Bala Govind
  - Thomas Tapen
  - Alyssa Apsel

  Publisher Correction13 May 2024
- ### Why my heart beats for Nigeria’s endangered bats

  Iroro Tanshi works to better understand a number of threatened species.

  - Linda Nordling

  Where I Work13 May 2024
- ### Dazzling auroras are just a warm-up as more solar storms are likely, scientists say

  *Nature* talks to physicists about what to expect in the next months and beyond as the Sun hits its 'maximum'.

  - Alexandra Witze

  News Explainer13 May 2024
- ### Decent work for all: why multinationals need a helping hand

  Moses Ngoze explains why the growth of micro, small and medium enterprises in Africa are key to achieving global economic growth.

  - Dom Byrne

  Nature Careers Podcast13 May 2024
- ### World’s brightest X-rays: China first in Asia to build next-generation synchrotron

  The US$665-million High Energy Photon Source (HEPS) outside Beijing puts China among only a handful of countries that have fourth-generation synchrotron light sources.

  - Gemma Conroy

  News13 May 2024
- ### Brain-reading device is best yet at decoding ‘internal speech’

  Technology that enables researchers to interpret brain signals could one day allow people to talk using only their thoughts.

  - Miryam Naddaf

  News13 May 2024
- ### Human embryos embrace asymmetry to form the body

  The cells generated by the very first division of the fertilized egg make a lopsided contribution to the body’s organs and tissues.

  - Sara Reardon

  News13 May 2024
- ### Is the Internet bad for you? Huge study reveals surprise effect on well-being

  A survey of more than 2.4 million people finds that being online can have a positive effect on welfare.

  - Carissa Wong

  News12 May 2024
- ### These parrots go on killing sprees over real-estate shortages

  Scientists recorded green-rumped parrotlets pecking others’ chicks to death, probably to claim the nest space.

  Research Highlight10 May 2024
- ### A jawless-fish genome untangles the history of vertebrate genome multiplications

  Clarifying how genome duplication and triplication events shaped early vertebrate genomes has presented a challenge in evolutionary biology. The genome of the jawless hagfish provides a missing piece of this puzzle.

  Research Briefing10 May 2024
- ### Daily briefing: A millimetre of brain in spectacular detail

  Google scientists have modelled a tiny fragment of the human brain at nanoscale resolution. Plus, a bold proposal to limit extreme wealth.

  - Katrina Krämer

  Nature Briefing10 May 2024
- ### Diana Wall obituary: ecologist who foresaw the importance of soil biodiversity

  Environmental scientist who revealed the crucial role of underground animals in sustainability.

  - Richard D. Bardgett

  Obituary10 May 2024
- ### Rhizobia–diatom symbiosis fixes missing nitrogen in the ocean

  - Bernhard Tschitschko
  - Mertcan Esti
  - Marcel M. M. Kuypers

  Article09 May 2024
- ### CRISPR therapy restores some vision to people with blindness

  People with an inherited condition that causes vision loss in childhood had vision improvements after treatment to replace a mutated gene.

  Research Highlight09 May 2024
- ### Daily briefing: ‘The ugly side of science’ — how to report negative results

  Data repositories, workshops and alternative journals allow scientists to destigmatize and discuss negative results. Plus, a major step toward ultra-precise ‘nuclear’ clocks and the first rocky exoplanet with a confirmed atmosphere.

  - Katrina Krämer

  Nature Briefing09 May 2024
- ### The US Congress is taking on AI —this computer scientist is helping

  Kiri Wagstaff, who temporarily shelved her academic career to provide advice on federal AI legislation, talks about life inside the halls of power.

  - Nicola Jones

  News Q&A09 May 2024
- ### Cubic millimetre of brain mapped in spectacular detail

  Google scientists have modelled a fragment of the human brain at nanoscale resolution, revealing cells with previously undiscovered features.

  - Carissa Wong

  News09 May 2024
- ### US TikTok ban: how the looming restriction is affecting scientists on the app

  *Nature* talks to researchers about what is at stake if users in the country lose access.

  - Ariana Remmel

  News09 May 2024

- Previous page
- page 1
- page 2
- page 3
- …
- page 21806
- Next page

## Explore content

- Research articles
- News
- Opinion
- Research Analysis
- Careers
- Books & Culture
- Podcasts
- Videos
- Current issue
- Browse issues
- Collections
- Subjects

- Follow us on Facebook
- Follow us on Twitter
- Subscribe
- Sign up for alerts
- RSS feed


## About the journal

- Journal Staff
- About the Editors
- Journal Information
- Our publishing models
- Editorial Values Statement
- Journal Metrics
- Awards
- Contact
- Editorial policies
- History of Nature
- Send a news tip


## Publish with us

- For Authors
- For Referees
- Language editing services
- Submit manuscript

## Search

Search articles by subject, keyword or author

Show results from

All journals
This journal

Search

Advanced search

### Quick links

- Explore articles by subject
- Find a job
- Guide to authors
- Editorial policies

Nature (*Nature*)

ISSN 1476-4687 (online)

ISSN 0028-0836 (print)

## nature.com sitemap

### About Nature Portfolio

- About us
- Press releases
- Press office
- Contact us

### Discover content

- Journals A-Z
- Articles by subject
- protocols.io
- Nature Index

### Publishing policies

- Nature portfolio policies
- Open access

### Author & Researcher services

- Reprints & permissions
- Research data
- Language editing
- Scientific editing
- Nature Masterclasses
- Research Solutions

### Libraries & institutions

- Librarian service & tools
- Librarian portal
- Open research
- Recommend to library

### Advertising & partnerships

- Advertising
- Partnerships & Services
- Media kits
- Branded
  content

### Professional development

- Nature Careers
- Nature 
  Conferences

### Regional websites

- Nature Africa
- Nature China
- Nature India
- Nature Italy
- Nature Japan
- Nature Middle East

- Privacy
  Policy
- Use
  of cookies
- Your privacy choices/Manage cookies
- Legal
  notice
- Accessibility
  statement
- Terms & Conditions
- Your US state privacy rights

© 2024 Springer Nature Limited

xml version="1.0" encoding="UTF-8"?
